# Supplementary material
Source: ML conference proceedings conference paper supplement (https://proceedings.neurips.cc/paper_files/paper/2018/hash/6a81681a7af700c6385d36577ebec359-Abstract.html)
Supplement: Supplementary file 2 [file 6a81681a7af700c6385d36577ebec359-Supplemental.zip]

Archive with 1 entries (1 files):
- nips18_final_supplementary.pdf
